# Supplementary material for: Ultra-high reversible hydrogen storage capacity of the Li4B2cluster: a quantum chemical study
Source: Royal Society of Chemistry journal article supplement (doi:10.1039/d2cp04443a), 2022-01-01
Supplement: d2cp04443a1.pdf [file d2cp04443a1.pdf]

## Ultra High Reversible Hydrogen Storage Capacity of $\text{Li}_4\text{B}_2$ Cluster: A Quantum Chemical Study

Kangkan Sarmah<sup>†</sup>, Shahnaz S. Rohman<sup>†</sup>, Siddhartha Purkayastha<sup>§</sup>, Amlan J. Kalita<sup>†</sup> and Ankur K. Guha<sup>\*†</sup>

<sup>†</sup>*Advanced Computational Chemistry Center, Cotton University, Guwahati 781001, India*

<sup>§</sup>*Department of Chemistry, Assam Don Bosco University, Sonapur 782402, India*

**TableS1:** The charge transfer calculated on the four Li atom separately after the adsorption of  $\text{H}_2$  using  $\omega\text{B97XD/def2TZVP}$  level.

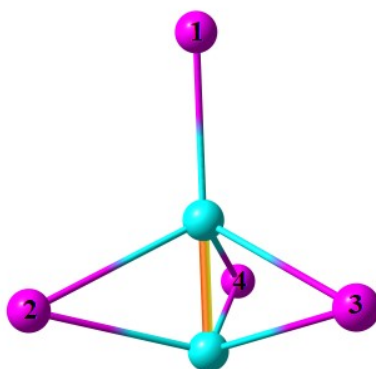

| Complex                              | Charge Transfer(e) |              |              |              |
|--------------------------------------|--------------------|--------------|--------------|--------------|
|                                      | Li (1)             | Li (2)       | Li(3)        | Li(4)        |
| $\text{Li}_4\text{B}_2$              | <b>0.789</b>       | <b>0.759</b> | <b>0.759</b> | <b>0.759</b> |
| $\text{Li}_4\text{B}_2\text{-1H}_2$  | <b>0.004</b>       |              |              |              |
| $\text{Li}_4\text{B}_2\text{-2H}_2$  | <b>0.010</b>       |              |              |              |
| $\text{Li}_4\text{B}_2\text{-3H}_2$  | <b>0.021</b>       |              |              |              |
| $\text{Li}_4\text{B}_2\text{-4H}_2$  | <b>0.033</b>       |              |              |              |
| $\text{Li}_4\text{B}_2\text{-5H}_2$  |                    | <b>0.013</b> |              |              |
| $\text{Li}_4\text{B}_2\text{-6H}_2$  |                    |              | <b>0.015</b> |              |
| $\text{Li}_4\text{B}_2\text{-7H}_2$  |                    |              |              | <b>0.030</b> |
| $\text{Li}_4\text{B}_2\text{-8H}_2$  |                    | <b>0.038</b> |              |              |
| $\text{Li}_4\text{B}_2\text{-9H}_2$  |                    |              | <b>0.040</b> |              |
| $\text{Li}_4\text{B}_2\text{-10H}_2$ |                    |              |              | <b>0.042</b> |
| $\text{Li}_4\text{B}_2\text{-11H}_2$ |                    | <b>0.024</b> |              |              |
| $\text{Li}_4\text{B}_2\text{-12H}_2$ |                    |              | <b>0.015</b> |              |
| $\text{Li}_4\text{B}_2\text{-13H}_2$ |                    |              |              | <b>0.018</b> |

Cartesian coordinates of the low-lying isomers at  $\omega$ B97XD/def2-TZVP level.

### **Li<sub>4</sub>B<sub>2</sub>**

|   |              |              |              |
|---|--------------|--------------|--------------|
| 5 | 1.097605000  | 0.000466000  | -0.002410000 |
| 5 | -0.424632000 | -0.000125000 | 0.000803000  |
| 3 | 0.470774000  | -1.466600000 | -1.388158000 |
| 3 | 0.472841000  | 1.936315000  | -0.574440000 |
| 3 | -2.543309000 | 0.000412000  | 0.003124000  |
| 3 | 0.478071000  | -0.470695000 | 1.962152000  |

### **Li<sub>4</sub>B<sub>2</sub>-1H<sub>2</sub>**

|   |              |              |              |
|---|--------------|--------------|--------------|
| 5 | 1.497439156  | -0.010109692 | -0.003917782 |
| 5 | -0.025646352 | 0.003843580  | 0.001279556  |
| 3 | 0.866676915  | -1.152224255 | 1.656372812  |
| 3 | 0.858198855  | -0.858087400 | -1.828777040 |
| 3 | -2.139606067 | 0.021169685  | 0.006010224  |
| 3 | 0.890635516  | 2.004556535  | 0.171626584  |
| 1 | -4.399227957 | 0.365183324  | -0.021301356 |
| 1 | -4.387451715 | -0.380096447 | 0.018794746  |

### **Li<sub>4</sub>B<sub>2</sub>-2H<sub>2</sub>**

|   |              |              |              |
|---|--------------|--------------|--------------|
| 5 | -1.731424000 | 0.002500000  | 0.066959000  |
| 5 | -0.211019000 | -0.001597000 | -0.032773000 |
| 3 | -1.180678000 | -1.770729000 | -0.930316000 |
| 3 | -0.979905000 | 0.064274000  | 2.035327000  |
| 3 | 1.898505000  | -0.007833000 | -0.169389000 |
| 3 | -1.180044000 | 1.704253000  | -1.047125000 |
| 1 | 3.237941000  | -1.739923000 | 0.110201000  |
| 1 | 3.806685000  | -1.275288000 | -0.032867000 |
| 1 | 3.786901000  | 1.295451000  | -0.029898000 |

|   |             |             |             |
|---|-------------|-------------|-------------|
| 1 | 3.207055000 | 1.745356000 | 0.116142000 |
|---|-------------|-------------|-------------|

### **Li<sub>4</sub>B<sub>2</sub>-3H<sub>2</sub>**

|   |              |              |              |
|---|--------------|--------------|--------------|
| 5 | 1.916570000  | -0.001781000 | -0.000309000 |
| 5 | 0.392978000  | 0.001677000  | -0.000324000 |
| 3 | 1.306199000  | 0.795383000  | -1.849842000 |
| 3 | 1.307519000  | 1.203423000  | 1.613953000  |
| 3 | -1.724496000 | 0.005198000  | -0.001714000 |
| 3 | 1.299723000  | -2.000379000 | 0.235375000  |
| 1 | -2.697218000 | 1.905617000  | -0.205331000 |
| 1 | -3.352754000 | 1.542825000  | -0.165182000 |
| 1 | -3.348591000 | -0.918638000 | -1.251525000 |
| 1 | -2.682861000 | -0.774876000 | 1.750385000  |
| 1 | -3.342191000 | -0.630269000 | 1.422514000  |
| 1 | -2.690959000 | -1.135010000 | -1.541012000 |

### **Li<sub>4</sub>B<sub>2</sub>-4H<sub>2</sub>**

|   |              |              |              |
|---|--------------|--------------|--------------|
| 5 | -1.996096000 | -0.006994000 | 0.027959000  |
| 5 | -0.473162000 | -0.002833000 | 0.009729000  |
| 3 | -1.402743000 | 1.613080000  | 1.216867000  |
| 3 | -1.444017000 | 0.215877000  | -1.979333000 |
| 3 | 1.661025000  | 0.001282000  | -0.017496000 |
| 3 | -1.402766000 | -1.856928000 | 0.810577000  |
| 1 | 2.099179000  | 1.451983000  | -1.481402000 |
| 1 | 2.901117000  | -1.300495000 | 1.330213000  |
| 1 | 2.937086000  | 1.345071000  | 1.271206000  |
| 1 | 2.083963000  | -1.480523000 | -1.452468000 |
| 1 | 2.821956000  | -1.362978000 | -1.355429000 |
| 1 | 2.207485000  | 1.467248000  | 1.409404000  |
| 1 | 2.168167000  | -1.405174000 | 1.467677000  |
| 1 | 2.836014000  | 1.326579000  | -1.387314000 |

**Li<sub>4</sub>B<sub>2</sub>-5H<sub>2</sub>**

|   |              |              |              |
|---|--------------|--------------|--------------|
| 5 | 1.678693000  | -0.869644000 | 0.010769000  |
| 5 | 0.242740000  | -0.361460000 | 0.004294000  |
| 3 | 0.771497000  | -1.654693000 | 1.725859000  |
| 3 | 0.795559000  | -1.648645000 | -1.717504000 |
| 3 | -1.773709000 | 0.335963000  | -0.008940000 |
| 3 | 1.827854000  | 1.217309000  | 0.000404000  |
| 1 | -2.849910000 | -1.422536000 | -0.378638000 |
| 1 | -2.290316000 | 2.495975000  | 0.333126000  |
| 1 | -3.060081000 | 0.425525000  | 1.820305000  |
| 1 | -2.022177000 | 0.874798000  | -2.014054000 |
| 1 | -2.737701000 | 1.069177000  | -1.876850000 |
| 1 | -2.369287000 | 0.187321000  | 2.003065000  |
| 1 | -1.548060000 | 2.384606000  | 0.396078000  |
| 1 | -3.493158000 | -1.029349000 | -0.374776000 |
| 1 | 2.631747000  | 3.404811000  | 0.005103000  |
| 1 | 3.268182000  | 3.015388000  | 0.011869000  |

**Li<sub>4</sub>B<sub>2</sub>-6H<sub>2</sub>**

|   |              |              |              |
|---|--------------|--------------|--------------|
| 5 | -1.698369000 | 0.127543000  | 0.590752000  |
| 5 | -0.209973000 | 0.006363000  | 0.290261000  |
| 3 | -0.725254000 | 0.042565000  | 2.439732000  |
| 3 | -1.211351000 | 1.858595000  | -0.466855000 |
| 3 | 1.876369000  | -0.149608000 | -0.123691000 |
| 3 | -1.488544000 | -1.643154000 | -0.499054000 |
| 1 | 2.545772000  | 1.730682000  | 0.478515000  |
| 1 | 2.805612000  | -1.985357000 | -1.007438000 |
| 1 | 3.398102000  | -0.878330000 | 1.336590000  |
| 1 | 1.921168000  | 0.502045000  | -2.103668000 |

|   |              |              |              |
|---|--------------|--------------|--------------|
| 1 | 2.672831000  | 0.438021000  | -2.118795000 |
| 1 | 2.710308000  | -0.924295000 | 1.640623000  |
| 1 | 2.069706000  | -2.092092000 | -0.886444000 |
| 1 | 3.246244000  | 1.559067000  | 0.256810000  |
| 1 | -0.997698000 | 3.875051000  | -1.602285000 |
| 1 | -1.723118000 | 3.902036000  | -1.430073000 |
| 1 | -1.884555000 | -3.655776000 | -1.612191000 |
| 1 | -2.576321000 | -3.465778000 | -1.407109000 |

### **Li<sub>4</sub>B<sub>2</sub>-7H<sub>2</sub>**

|   |              |              |              |
|---|--------------|--------------|--------------|
| 5 | -1.651558000 | -0.119566000 | 0.342518000  |
| 5 | -0.159630000 | -0.049209000 | 0.042355000  |
| 3 | -0.737557000 | -1.323585000 | 1.778440000  |
| 3 | -1.141743000 | 1.892967000  | 0.529501000  |
| 3 | 1.929029000  | 0.055357000  | -0.373644000 |
| 3 | -1.438902000 | -0.810140000 | -1.614613000 |
| 1 | 2.613497000  | 1.227092000  | 1.198644000  |
| 1 | 2.817296000  | -1.023088000 | -2.122874000 |
| 1 | 3.336148000  | -1.456359000 | 0.491098000  |
| 1 | 2.008292000  | 1.698636000  | -1.635004000 |
| 1 | 2.755903000  | 1.618094000  | -1.702293000 |
| 1 | 2.617407000  | -1.608297000 | 0.663040000  |
| 1 | 2.078754000  | -1.160856000 | -2.054194000 |
| 1 | 3.313079000  | 1.185853000  | 0.918384000  |
| 1 | -1.079566000 | 4.213563000  | 0.823037000  |
| 1 | -1.805612000 | 4.084914000  | 0.936760000  |
| 1 | -1.979596000 | -1.662632000 | -3.737042000 |
| 1 | -2.649410000 | -1.573163000 | -3.420627000 |
| 1 | -0.235310000 | -2.588422000 | 3.670525000  |
| 1 | -0.234200000 | -3.121218000 | 3.148151000  |

**Li<sub>4</sub>B<sub>2</sub>-8H<sub>2</sub>**

|   |              |              |              |
|---|--------------|--------------|--------------|
| 5 | -1.475904000 | -0.709659000 | 0.156934000  |
| 5 | -0.053802000 | -0.180448000 | 0.012288000  |
| 3 | -0.435023000 | -1.453385000 | 1.799492000  |
| 3 | -1.661993000 | 1.370548000  | 0.111496000  |
| 3 | 1.936135000  | 0.558540000  | -0.187247000 |
| 3 | -0.750886000 | -1.528223000 | -1.615616000 |
| 1 | 1.849354000  | 2.109417000  | 1.171868000  |
| 1 | 3.436101000  | -0.333793000 | -1.559909000 |
| 1 | 3.616568000  | -0.132890000 | 1.094341000  |
| 1 | 1.639733000  | 1.902210000  | -1.721924000 |
| 1 | 2.360186000  | 2.127847000  | -1.684108000 |
| 1 | 2.985172000  | -0.511133000 | 1.258572000  |
| 1 | 2.797361000  | -0.734537000 | -1.572610000 |
| 1 | 2.552127000  | 2.325000000  | 0.996100000  |
| 1 | -3.687641000 | 2.499360000  | 0.255068000  |
| 1 | -3.802634000 | 1.758364000  | 0.288200000  |
| 1 | -0.486557000 | -2.680708000 | -3.639378000 |
| 1 | -1.184194000 | -2.870795000 | -3.455751000 |
| 1 | 0.339560000  | -2.105586000 | 3.892517000  |
| 1 | 0.103135000  | -2.769129000 | 3.646869000  |
| 1 | -1.403765000 | 3.671038000  | -0.030175000 |
| 1 | -0.730675000 | 3.353424000  | -0.110165000 |

**Li<sub>4</sub>B<sub>2</sub>-9H<sub>2</sub>**

|   |              |              |             |
|---|--------------|--------------|-------------|
| 5 | -1.463663000 | -0.007383000 | 0.584642000 |
| 5 | 0.003266000  | -0.016352000 | 0.168239000 |
| 3 | -0.380299000 | 0.063275000  | 2.357256000 |

|   |              |              |              |
|---|--------------|--------------|--------------|
| 3 | -1.206025000 | 1.705326000  | -0.579050000 |
| 3 | 2.055764000  | -0.024977000 | -0.410597000 |
| 3 | -1.187546000 | -1.808167000 | -0.431415000 |
| 1 | 2.401204000  | 2.002299000  | -0.516316000 |
| 1 | 3.112577000  | -1.945870000 | -0.661199000 |
| 1 | 3.718504000  | 0.035878000  | 1.058317000  |
| 1 | 1.801864000  | -0.093626000 | -2.437069000 |
| 1 | 2.551179000  | -0.091955000 | -2.544330000 |
| 1 | 3.050218000  | 0.051748000  | 1.408048000  |
| 1 | 2.421380000  | -2.047864000 | -0.372888000 |
| 1 | 3.095560000  | 1.889687000  | -0.792564000 |
| 1 | -2.896509000 | -3.298369000 | -0.956351000 |
| 1 | -3.182015000 | 2.634072000  | -0.643166000 |
| 1 | 0.017548000  | -2.974308000 | -1.863171000 |
| 1 | -0.507649000 | -3.507848000 | -1.867953000 |
| 1 | 0.392844000  | 0.589322000  | 4.483547000  |
| 1 | 0.273415000  | -0.139620000 | 4.588344000  |
| 1 | -0.573144000 | 3.355062000  | -2.088718000 |
| 1 | -0.038991000 | 2.830863000  | -2.077739000 |
| 1 | -2.943054000 | 3.171023000  | -1.110317000 |
| 1 | -3.177746000 | -2.697487000 | -0.605307000 |

### **Li<sub>4</sub>B<sub>2</sub>-10H<sub>2</sub>**

|   |              |              |              |
|---|--------------|--------------|--------------|
| 5 | -1.637208000 | -0.771672000 | 0.119949000  |
| 5 | -0.189090000 | -0.310657000 | -0.017523000 |
| 3 | -0.629698000 | -1.587937000 | 1.753263000  |
| 3 | -1.713660000 | 1.307884000  | 0.176874000  |
| 3 | 1.836191000  | 0.326315000  | -0.216192000 |
| 3 | -0.998626000 | -1.505342000 | -1.720574000 |
| 1 | 1.845844000  | 1.854643000  | 1.149723000  |

|   |              |              |              |
|---|--------------|--------------|--------------|
| 1 | 3.201248000  | -0.698092000 | -1.617988000 |
| 1 | 3.449610000  | -0.507217000 | 1.052451000  |
| 1 | 1.582003000  | 1.665567000  | -1.737299000 |
| 1 | 2.317784000  | 1.843688000  | -1.723706000 |
| 1 | 2.786901000  | -0.840088000 | 1.194582000  |
| 1 | 2.529923000  | -1.043298000 | -1.584323000 |
| 1 | 2.560240000  | 2.028915000  | 0.971905000  |
| 1 | -2.389171000 | -2.658828000 | -3.199969000 |
| 1 | -3.823453000 | 1.840603000  | 0.400372000  |
| 1 | 0.335414000  | -1.270547000 | -3.457501000 |
| 1 | -0.048018000 | -1.801531000 | -3.820181000 |
| 1 | 0.956708000  | -1.482290000 | 3.288280000  |
| 1 | 0.618786000  | -2.042990000 | 3.650867000  |
| 1 | -1.313131000 | 3.599386000  | 0.132488000  |
| 1 | -0.665279000 | 3.238536000  | 0.029337000  |
| 1 | -3.662313000 | 2.573710000  | 0.400652000  |
| 1 | -2.761987000 | -2.469174000 | -2.576397000 |
| 1 | -1.779912000 | -2.854688000 | 3.354823000  |
| 1 | -2.237973000 | -2.618452000 | 2.808038000  |

### **Li<sub>4</sub>B<sub>2</sub>-11H<sub>2</sub>**

|   |              |              |              |
|---|--------------|--------------|--------------|
| 5 | -1.617641000 | -0.763918000 | 0.089853000  |
| 5 | -0.185761000 | -0.251978000 | -0.023819000 |
| 3 | -0.650296000 | -1.448856000 | 1.800840000  |
| 3 | -1.767072000 | 1.312752000  | 0.123110000  |
| 3 | 1.821132000  | 0.444903000  | -0.205841000 |
| 3 | -0.897174000 | -1.551224000 | -1.706401000 |
| 1 | 1.915470000  | 1.565024000  | 1.490302000  |
| 1 | 2.994817000  | -0.204254000 | -1.964239000 |
| 1 | 3.448989000  | -0.745432000 | 0.648752000  |



|   |              |              |              |
|---|--------------|--------------|--------------|
| 1 | 1.475353000  | 2.116109000  | -1.318348000 |
| 1 | 2.210141000  | 2.298027000  | -1.304674000 |
| 1 | 2.780088000  | -1.089845000 | 0.731762000  |
| 1 | 2.295694000  | -0.492221000 | -1.960326000 |
| 1 | 2.631485000  | 1.758691000  | 1.336815000  |
| 1 | -0.283304000 | -0.448715000 | -3.484315000 |
| 1 | -3.895864000 | 1.764386000  | 0.321167000  |
| 1 | 0.654313000  | -3.055483000 | -2.009263000 |
| 1 | 0.376917000  | -3.226009000 | -2.684846000 |
| 1 | 1.074876000  | -1.266716000 | 3.153913000  |
| 1 | 0.765295000  | -1.758436000 | 3.626356000  |
| 1 | -1.440446000 | 3.612892000  | 0.286198000  |
| 1 | -0.774919000 | 3.270416000  | 0.307213000  |
| 1 | -3.765149000 | 2.503619000  | 0.317247000  |
| 1 | -0.393305000 | -1.045748000 | -3.925397000 |
| 1 | -1.636540000 | -2.678773000 | 3.517333000  |
| 1 | -2.139477000 | -2.529282000 | 2.980627000  |
| 1 | -2.282293000 | -2.777876000 | -3.011212000 |
| 1 | -2.640998000 | -2.549582000 | -2.389152000 |

### **Li<sub>4</sub>B<sub>2</sub>-12H<sub>2</sub>**

|   |              |              |              |
|---|--------------|--------------|--------------|
| 5 | -1.693996000 | -0.646150000 | 0.117448000  |
| 5 | -0.251943000 | -0.161256000 | 0.031832000  |
| 3 | -0.770329000 | -1.353901000 | 1.842745000  |
| 3 | -1.825116000 | 1.436844000  | 0.114878000  |
| 3 | 1.759181000  | 0.531311000  | -0.120849000 |
| 3 | -0.920381000 | -1.545720000 | -1.600228000 |
| 1 | 1.949576000  | 1.243786000  | 1.762825000  |
| 1 | 2.759432000  | 0.300457000  | -2.064285000 |
| 1 | 3.369824000  | -0.858576000 | 0.320762000  |

|   |              |              |              |
|---|--------------|--------------|--------------|
| 1 | 1.334541000  | 2.405390000  | -0.768482000 |
| 1 | 2.066002000  | 2.601129000  | -0.772806000 |
| 1 | 2.690762000  | -1.187692000 | 0.393175000  |
| 1 | 2.040225000  | 0.064533000  | -2.078706000 |
| 1 | 2.664927000  | 1.455354000  | 1.627734000  |
| 1 | -0.622746000 | -0.503417000 | -3.497649000 |
| 1 | -3.867259000 | 1.730715000  | 0.614846000  |
| 1 | 0.888788000  | -2.694628000 | -1.876728000 |
| 1 | 0.639377000  | -2.994640000 | -2.518515000 |
| 1 | 1.065957000  | -1.506805000 | 3.044503000  |
| 1 | 0.705049000  | -1.904144000 | 3.566861000  |
| 1 | -2.056383000 | 3.249260000  | -1.337145000 |
| 1 | -1.689959000 | 2.690789000  | -1.677389000 |
| 1 | -3.778035000 | 2.478058000  | 0.586483000  |
| 1 | -0.641651000 | -1.145315000 | -3.884978000 |
| 1 | -1.771521000 | -2.596147000 | 3.544559000  |
| 1 | -2.271284000 | -2.440660000 | 3.006720000  |
| 1 | -2.115786000 | -3.094594000 | -2.728396000 |
| 1 | -2.504507000 | -2.850775000 | -2.131039000 |
| 1 | -1.265464000 | 3.424497000  | 1.169599000  |
| 1 | -0.761189000 | 2.884889000  | 1.307414000  |

### **Li<sub>4</sub>B<sub>2</sub>-13H<sub>2</sub>**

|   |              |              |              |
|---|--------------|--------------|--------------|
| 5 | -1.473802000 | -0.704574000 | 0.238590000  |
| 5 | -0.067014000 | -0.140133000 | 0.094130000  |
| 3 | -0.441214000 | -1.424494000 | 1.900226000  |
| 3 | -1.730344000 | 1.364175000  | 0.251745000  |
| 3 | 1.903395000  | 0.654353000  | -0.117660000 |
| 3 | -0.743104000 | -1.489813000 | -1.556701000 |
| 1 | 1.915504000  | 1.574639000  | 1.662730000  |

|   |              |              |              |
|---|--------------|--------------|--------------|
| 1 | 3.029893000  | 0.274203000  | -1.934104000 |
| 1 | 3.548713000  | -0.564767000 | 0.616824000  |
| 1 | 1.320780000  | 2.374506000  | -0.987749000 |
| 1 | 2.026331000  | 2.652558000  | -0.996462000 |
| 1 | 2.879235000  | -0.912556000 | 0.693517000  |
| 1 | 2.345172000  | -0.047370000 | -1.960585000 |
| 1 | 2.612118000  | 1.854601000  | 1.547744000  |
| 1 | -0.389647000 | -0.509880000 | -3.479245000 |
| 1 | -3.696922000 | 1.689236000  | 1.016799000  |
| 1 | 0.989114000  | -2.774269000 | -1.815064000 |
| 1 | 0.713088000  | -3.078864000 | -2.443492000 |
| 1 | 0.913792000  | -0.397363000 | 3.217224000  |
| 1 | 0.879895000  | -0.922803000 | 3.753927000  |
| 1 | -2.110103000 | 3.138911000  | -1.239109000 |
| 1 | -1.779155000 | 2.558170000  | -1.578813000 |
| 1 | -3.595994000 | 2.430687000  | 0.939607000  |
| 1 | -0.480616000 | -1.164447000 | -3.833189000 |
| 1 | -1.482890000 | -2.335974000 | 3.691607000  |
| 1 | -1.991435000 | -2.131755000 | 3.175455000  |
| 1 | -2.001088000 | -3.052726000 | -2.611106000 |
| 1 | -2.340127000 | -2.805230000 | -1.984426000 |
| 1 | -1.051213000 | 3.383675000  | 1.202878000  |
| 1 | -0.529167000 | 2.843487000  | 1.243058000  |
| 1 | 0.747608000  | -3.312976000 | 2.599814000  |
| 1 | 0.841636000  | -3.203713000 | 1.864257000  |

Cartesian coordinates of the low-lying isomers at B3LYP/def2-TZVP level

### **Li<sub>4</sub>B<sub>2</sub>**

|   |             |              |              |
|---|-------------|--------------|--------------|
| 5 | 1.482700000 | -0.009595000 | -0.003055000 |
|---|-------------|--------------|--------------|

|   |              |              |              |
|---|--------------|--------------|--------------|
| 5 | -0.038379000 | 0.001638000  | -0.000201000 |
| 3 | 0.816501000  | -1.137106000 | 1.637314000  |
| 3 | 0.812228000  | -0.846774000 | -1.807344000 |
| 3 | -2.137389000 | 0.015210000  | 0.002883000  |
| 3 | 0.836729000  | 1.980100000  | 0.169300000  |

### **Li<sub>4</sub>B<sub>2</sub>-1H<sub>2</sub>**

|   |              |              |              |
|---|--------------|--------------|--------------|
| 5 | 1.480932000  | -0.009758000 | -0.003146000 |
| 5 | -0.041486000 | 0.001747000  | -0.000150000 |
| 3 | 0.815699000  | -1.135982000 | 1.636432000  |
| 3 | 0.811456000  | -0.846006000 | -1.806380000 |
| 3 | -2.130138000 | 0.015095000  | 0.002855000  |
| 3 | 0.835927000  | 1.978378000  | 0.169287000  |
| 1 | -4.310266000 | 0.368312000  | -0.017817000 |
| 1 | -4.301104000 | -0.377549000 | 0.019008000  |

### **Li<sub>4</sub>B<sub>2</sub>-2H<sub>2</sub>**

|   |              |              |              |
|---|--------------|--------------|--------------|
| 5 | -1.686142000 | -0.001412000 | 0.049057000  |
| 5 | -0.164582000 | -0.001288000 | -0.010142000 |
| 3 | -1.075528000 | -1.762682000 | -0.900859000 |
| 3 | -0.961074000 | 0.075969000  | 2.009684000  |
| 3 | 1.927379000  | -0.000377000 | -0.084955000 |
| 3 | -1.081607000 | 1.683579000  | -1.033382000 |
| 1 | 3.127642000  | -1.711414000 | 0.036337000  |
| 1 | 3.735582000  | -1.278035000 | -0.035147000 |
| 1 | 3.722532000  | 1.293357000  | -0.011643000 |
| 1 | 3.109816000  | 1.718766000  | 0.067311000  |

### **Li<sub>4</sub>B<sub>2</sub>-3H<sub>2</sub>**

|   |             |              |              |
|---|-------------|--------------|--------------|
| 5 | 1.784699000 | 0.000871000  | -0.002285000 |
| 5 | 0.262633000 | -0.000179000 | -0.000495000 |
| 3 | 1.155688000 | 0.793810000  | -1.825077000 |

|   |              |              |              |
|---|--------------|--------------|--------------|
| 3 | 1.159005000  | 1.183388000  | 1.596995000  |
| 3 | -1.849156000 | -0.002571000 | 0.002512000  |
| 3 | 1.159294000  | -1.975385000 | 0.223885000  |
| 1 | -2.530709000 | 1.851859000  | -0.204354000 |
| 1 | -3.230911000 | 1.572264000  | -0.173123000 |
| 1 | -3.231051000 | -0.940768000 | -1.273533000 |
| 1 | -2.532458000 | -0.749587000 | 1.711892000  |
| 1 | -3.232088000 | -0.635733000 | 1.453197000  |
| 1 | -2.531026000 | -1.104799000 | -1.502627000 |

### **Li<sub>4</sub>B<sub>2</sub>-4H<sub>2</sub>**

|   |              |              |              |
|---|--------------|--------------|--------------|
| 5 | -1.912266000 | 0.005612000  | 0.024427000  |
| 5 | -0.391604000 | 0.023072000  | -0.019382000 |
| 3 | -1.299558000 | 1.703990000  | 1.052829000  |
| 3 | -1.379053000 | 0.075934000  | -1.980240000 |
| 3 | 1.751152000  | 0.049480000  | -0.079296000 |
| 3 | -1.268982000 | -1.752897000 | 0.922464000  |
| 1 | 1.981879000  | 1.358338000  | -1.583464000 |
| 1 | 2.881390000  | -1.148014000 | 1.313508000  |
| 1 | 2.883167000  | 1.473230000  | 1.087900000  |
| 1 | 1.997775000  | -1.465497000 | -1.359112000 |
| 1 | 2.747813000  | -1.369925000 | -1.321052000 |
| 1 | 2.142007000  | 1.560968000  | 1.207178000  |
| 1 | 2.139696000  | -1.213452000 | 1.445453000  |
| 1 | 2.732780000  | 1.276621000  | -1.538138000 |

### **Li<sub>4</sub>B<sub>2</sub>-5H<sub>2</sub>**

|   |              |              |              |
|---|--------------|--------------|--------------|
| 5 | 1.627405000  | -0.882768000 | 0.355129000  |
| 5 | 0.202005000  | -0.362320000 | 0.243716000  |
| 3 | 0.754218000  | -1.102011000 | 2.225304000  |
| 3 | 0.654984000  | -2.079765000 | -1.033140000 |
| 3 | -1.810768000 | 0.364834000  | 0.092220000  |
| 3 | 1.811485000  | 1.086125000  | -0.252789000 |

|   |              |              |              |
|---|--------------|--------------|--------------|
| 1 | -2.700189000 | -1.237713000 | -0.731658000 |
| 1 | -2.189996000 | 2.341571000  | 0.793390000  |
| 1 | -3.220311000 | 0.086069000  | 1.688590000  |
| 1 | -1.621265000 | 1.148184000  | -1.719147000 |
| 1 | -2.336293000 | 1.397390000  | -1.684277000 |
| 1 | -2.557805000 | -0.234051000 | 1.863885000  |
| 1 | -1.469375000 | 2.143257000  | 0.917623000  |
| 1 | -3.354607000 | -0.858672000 | -0.754164000 |
| 1 | 2.536960000  | 2.999180000  | -1.254069000 |
| 1 | 2.595995000  | 3.205295000  | -0.539187000 |

### **Li<sub>4</sub>B<sub>2</sub>-6H<sub>2</sub>**

|   |              |              |              |
|---|--------------|--------------|--------------|
| 5 | -1.672715000 | 0.105319000  | 0.614361000  |
| 5 | -0.191512000 | -0.013754000 | 0.286170000  |
| 3 | -0.664845000 | -0.158476000 | 2.407863000  |
| 3 | -1.162593000 | 1.893744000  | -0.286629000 |
| 3 | 1.901490000  | -0.190737000 | -0.163089000 |
| 3 | -1.508787000 | -1.550300000 | -0.612271000 |
| 1 | 2.357946000  | 1.730592000  | 0.023124000  |
| 1 | 2.673093000  | -2.125423000 | -0.582838000 |
| 1 | 3.355109000  | -0.510683000 | 1.370545000  |
| 1 | 1.688735000  | 0.035441000  | -2.104834000 |
| 1 | 2.439908000  | -0.034418000 | -2.189588000 |
| 1 | 2.662878000  | -0.468914000 | 1.674069000  |
| 1 | 1.940431000  | -2.161329000 | -0.392308000 |
| 1 | 3.070696000  | 1.581570000  | -0.187050000 |
| 1 | -1.207913000 | 3.816797000  | -1.538322000 |
| 1 | -1.146096000 | 4.116571000  | -0.857726000 |
| 1 | -1.909701000 | -3.203842000 | -2.154339000 |
| 1 | -1.895197000 | -3.614580000 | -1.531460000 |

### **Li<sub>4</sub>B<sub>2</sub>-7H<sub>2</sub>**

|   |              |              |             |
|---|--------------|--------------|-------------|
| 5 | -1.652698000 | -0.131133000 | 0.393615000 |
|---|--------------|--------------|-------------|

|   |              |              |              |
|---|--------------|--------------|--------------|
| 5 | -0.168881000 | -0.057327000 | 0.061993000  |
| 3 | -0.723467000 | -1.454752000 | 1.677400000  |
| 3 | -1.108117000 | 1.832046000  | 0.719853000  |
| 3 | 1.923881000  | 0.048065000  | -0.420060000 |
| 3 | -1.504618000 | -0.681971000 | -1.588137000 |
| 1 | 2.380059000  | 1.552310000  | 0.769345000  |
| 1 | 2.673261000  | -1.349084000 | -1.803943000 |
| 1 | 3.294782000  | -1.081324000 | 0.733048000  |
| 1 | 1.716083000  | 1.294788000  | -1.925378000 |
| 1 | 2.467334000  | 1.274439000  | -2.034542000 |
| 1 | 2.585091000  | -1.178210000 | 0.981990000  |
| 1 | 1.936810000  | -1.473061000 | -1.668165000 |
| 1 | 3.094952000  | 1.528782000  | 0.516541000  |
| 1 | -1.156779000 | 4.143536000  | 0.796821000  |
| 1 | -1.066596000 | 4.005335000  | 1.524540000  |
| 1 | -1.920113000 | -1.028935000 | -3.844545000 |
| 1 | -1.872425000 | -1.737728000 | -3.616368000 |
| 1 | -0.239592000 | -2.739772000 | 3.556214000  |
| 1 | -0.302647000 | -3.286063000 | 3.051940000  |

### **Li<sub>4</sub>B<sub>2</sub>-8H<sub>2</sub>**

|   |              |              |              |
|---|--------------|--------------|--------------|
| 5 | -1.448714000 | -0.622927000 | 0.181393000  |
| 5 | -0.021616000 | -0.118592000 | 0.015079000  |
| 3 | -0.433116000 | -1.284404000 | 1.847762000  |
| 3 | -1.613556000 | 1.438515000  | 0.060843000  |
| 3 | 2.008945000  | 0.555540000  | -0.221020000 |
| 3 | -0.732056000 | -1.521722000 | -1.531085000 |
| 1 | 1.941986000  | 1.827171000  | 1.253054000  |
| 1 | 3.221590000  | -0.285436000 | -1.741274000 |
| 1 | 3.531661000  | -0.441821000 | 0.853043000  |
| 1 | 1.592873000  | 1.964852000  | -1.511495000 |
| 1 | 2.325179000  | 2.167888000  | -1.519947000 |
| 1 | 2.858805000  | -0.771495000 | 0.971280000  |

|   |              |              |              |
|---|--------------|--------------|--------------|
| 1 | 2.535647000  | -0.608112000 | -1.736764000 |
| 1 | 2.659521000  | 2.027379000  | 1.100618000  |
| 1 | -3.735677000 | 2.419201000  | 0.210837000  |
| 1 | -3.726213000 | 1.668129000  | 0.260269000  |
| 1 | -0.609012000 | -2.438948000 | -3.682704000 |
| 1 | -0.430639000 | -3.045399000 | -3.286428000 |
| 1 | 0.158825000  | -1.857601000 | 4.032830000  |
| 1 | 0.211174000  | -2.531358000 | 3.716646000  |
| 1 | -1.525777000 | 3.696510000  | -0.068391000 |
| 1 | -0.827473000 | 3.428091000  | -0.097682000 |

**Li<sub>4</sub>B<sub>2</sub>-9H<sub>2</sub>**

|   |              |              |              |
|---|--------------|--------------|--------------|
| 5 | -1.400422000 | 0.013527000  | 0.487701000  |
| 5 | 0.068634000  | 0.006716000  | 0.085222000  |
| 3 | -0.341420000 | 0.061983000  | 2.252771000  |
| 3 | -1.138125000 | 1.723773000  | -0.649493000 |
| 3 | 2.160723000  | -0.011463000 | -0.425874000 |
| 3 | -1.129298000 | -1.747680000 | -0.567390000 |
| 1 | 2.372085000  | 1.927552000  | -0.633564000 |
| 1 | 3.123990000  | -1.873155000 | -0.459172000 |
| 1 | 3.602887000  | 0.159194000  | 1.115631000  |
| 1 | 1.877559000  | -0.198611000 | -2.341583000 |
| 1 | 2.631514000  | -0.206103000 | -2.442780000 |
| 1 | 2.900292000  | 0.184883000  | 1.400014000  |
| 1 | 2.400567000  | -1.946204000 | -0.238689000 |
| 1 | 3.096385000  | 1.823429000  | -0.836138000 |
| 1 | -2.933861000 | -3.236898000 | -0.852944000 |
| 1 | -3.100475000 | 2.603881000  | -0.536671000 |
| 1 | -0.047634000 | -3.016563000 | -1.936943000 |
| 1 | -0.610057000 | -3.510590000 | -1.924080000 |
| 1 | 0.321431000  | 0.412016000  | 4.494464000  |
| 1 | 0.354607000  | -0.332856000 | 4.469673000  |
| 1 | -0.684133000 | 3.379146000  | -2.160764000 |



|   |              |              |              |
|---|--------------|--------------|--------------|
| 1 | -0.139744000 | 2.866051000  | -2.189728000 |
| 1 | -2.958917000 | 3.208238000  | -0.961952000 |
| 1 | -3.087907000 | -2.615537000 | -0.457465000 |

### **Li<sub>4</sub>B<sub>2</sub>-10H<sub>2</sub>**

|   |              |              |              |
|---|--------------|--------------|--------------|
| 5 | -1.548270000 | -0.693374000 | 0.099529000  |
| 5 | -0.098949000 | -0.243013000 | -0.035478000 |
| 3 | -0.579259000 | -1.481279000 | 1.746269000  |
| 3 | -1.619469000 | 1.372303000  | 0.130476000  |
| 3 | 1.958229000  | 0.378584000  | -0.222998000 |
| 3 | -0.918075000 | -1.442181000 | -1.720557000 |
| 1 | 1.872291000  | 1.715114000  | 1.187570000  |
| 1 | 3.172171000  | -0.583799000 | -1.647476000 |
| 1 | 3.411790000  | -0.596177000 | 0.943802000  |
| 1 | 1.617670000  | 1.725748000  | -1.583653000 |
| 1 | 2.357543000  | 1.903021000  | -1.578505000 |
| 1 | 2.724279000  | -0.898162000 | 1.056416000  |
| 1 | 2.475966000  | -0.886322000 | -1.633864000 |
| 1 | 2.598410000  | 1.894252000  | 1.047922000  |
| 1 | -2.441299000 | -2.760934000 | -3.005944000 |
| 1 | -3.729854000 | 1.732531000  | 0.339057000  |
| 1 | 0.273294000  | -1.383597000 | -3.537259000 |
| 1 | -0.157077000 | -1.920181000 | -3.832385000 |
| 1 | 0.924035000  | -1.517085000 | 3.324777000  |
| 1 | 0.537248000  | -2.056435000 | 3.670379000  |
| 1 | -1.422678000 | 3.651651000  | 0.112399000  |
| 1 | -0.744322000 | 3.346438000  | 0.028001000  |
| 1 | -3.702633000 | 2.484600000  | 0.344472000  |
| 1 | -2.695246000 | -2.501458000 | -2.346633000 |
| 1 | -1.866719000 | -2.852768000 | 3.261380000  |
| 1 | -2.227941000 | -2.571033000 | 2.664252000  |

### **Li<sub>4</sub>B<sub>2</sub>-11H<sub>2</sub>**

|                                                    |              |              |              |
|----------------------------------------------------|--------------|--------------|--------------|
| 5                                                  | -1.533253000 | -0.681218000 | 0.043883000  |
| 5                                                  | -0.094820000 | -0.194590000 | -0.070298000 |
| 3                                                  | -0.598571000 | -1.349378000 | 1.761714000  |
| 3                                                  | -1.646211000 | 1.384898000  | 0.063543000  |
| 3                                                  | 1.941719000  | 0.492355000  | -0.229584000 |
| 3                                                  | -0.822443000 | -1.540596000 | -1.716824000 |
| 1                                                  | 2.004669000  | 1.362525000  | 1.512896000  |
| 1                                                  | 2.998650000  | 0.031024000  | -2.002667000 |
| 1                                                  | 3.435825000  | -0.805149000 | 0.435871000  |
| 1                                                  | 1.568452000  | 2.213104000  | -1.093884000 |
| 1                                                  | 2.310884000  | 2.373258000  | -1.081765000 |
| 1                                                  | 2.748431000  | -1.122805000 | 0.507363000  |
| 1                                                  | 2.284717000  | -0.224564000 | -2.028186000 |
| 1                                                  | 2.728755000  | 1.551894000  | 1.377563000  |
| 1                                                  | -0.407693000 | -0.565222000 | -3.620848000 |
| 1                                                  | -3.806326000 | 1.644793000  | 0.296294000  |
| 1                                                  | 0.679051000  | -3.080665000 | -1.870329000 |
| 1                                                  | 0.421439000  | -3.335076000 | -2.527790000 |
| 1                                                  | 1.044225000  | -1.461554000 | 3.188916000  |
| 1                                                  | 0.633053000  | -1.895839000 | 3.638968000  |
| 1                                                  | -1.637157000 | 3.679885000  | 0.219120000  |
| 1                                                  | -0.929669000 | 3.437218000  | 0.240087000  |
| 1                                                  | -3.842134000 | 2.396511000  | 0.296970000  |
| 1                                                  | -0.526086000 | -1.194768000 | -4.010809000 |
| 1                                                  | -1.820175000 | -2.620076000 | 3.397170000  |
| 1                                                  | -2.205063000 | -2.395387000 | 2.791200000  |
| 1                                                  | -2.302385000 | -2.829124000 | -2.707250000 |
| 1                                                  | -2.553555000 | -2.508982000 | -2.067670000 |
| <b>Li<sub>4</sub>B<sub>2</sub>-12H<sub>2</sub></b> |              |              |              |
| 5                                                  | -1.588632000 | -0.609038000 | 0.133975000  |
| 5                                                  | -0.151844000 | -0.120768000 | 0.017277000  |
| 3                                                  | -0.629772000 | -1.328943000 | 1.818469000  |

|   |              |              |              |
|---|--------------|--------------|--------------|
| 3 | -1.730183000 | 1.469239000  | 0.106911000  |
| 3 | 1.879321000  | 0.586397000  | -0.132419000 |
| 3 | -0.865609000 | -1.517423000 | -1.594272000 |
| 1 | 1.990089000  | 1.263137000  | 1.690175000  |
| 1 | 2.871929000  | 0.355868000  | -1.973604000 |
| 1 | 3.400507000  | -0.751990000 | 0.335895000  |
| 1 | 1.437043000  | 2.392084000  | -0.756588000 |
| 1 | 2.174002000  | 2.574797000  | -0.761866000 |
| 1 | 2.719046000  | -1.083563000 | 0.402855000  |
| 1 | 2.158751000  | 0.098618000  | -2.011921000 |
| 1 | 2.707701000  | 1.477125000  | 1.555653000  |
| 1 | -0.831228000 | -0.515621000 | -3.600005000 |
| 1 | -3.734653000 | 1.450141000  | 0.351384000  |
| 1 | 0.760822000  | -2.850338000 | -1.937503000 |
| 1 | 0.439657000  | -3.128970000 | -2.556128000 |
| 1 | 1.068501000  | -1.559844000 | 3.149834000  |
| 1 | 0.657719000  | -1.977579000 | 3.616022000  |
| 1 | -1.956323000 | 3.276834000  | -1.384223000 |
| 1 | -1.529500000 | 2.725689000  | -1.661253000 |
| 1 | -3.797390000 | 2.205420000  | 0.340937000  |
| 1 | -0.874019000 | -1.150479000 | -3.995687000 |
| 1 | -1.827104000 | -2.602546000 | 3.440539000  |
| 1 | -2.222588000 | -2.364401000 | 2.846256000  |
| 1 | -2.275612000 | -2.992727000 | -2.489636000 |
| 1 | -2.530081000 | -2.659058000 | -1.859106000 |
| 1 | -1.554550000 | 3.428501000  | 1.349687000  |
| 1 | -1.039907000 | 2.922030000  | 1.553531000  |

### **Li<sub>4</sub>B<sub>2</sub>-13H<sub>2</sub>**

|   |              |              |             |
|---|--------------|--------------|-------------|
| 5 | -1.433340000 | -0.677072000 | 0.270409000 |
| 5 | -0.031948000 | -0.111762000 | 0.097540000 |
| 3 | -0.407834000 | -1.343736000 | 1.948813000 |

|   |              |              |              |
|---|--------------|--------------|--------------|
| 3 | -1.686247000 | 1.393762000  | 0.209118000  |
| 3 | 1.953769000  | 0.694136000  | -0.154670000 |
| 3 | -0.737319000 | -1.544564000 | -1.488131000 |
| 1 | 2.074730000  | 1.427409000  | 1.628423000  |
| 1 | 2.880345000  | 0.446744000  | -2.021600000 |
| 1 | 3.511493000  | -0.589481000 | 0.311571000  |
| 1 | 1.398414000  | 2.451126000  | -0.808082000 |
| 1 | 2.125494000  | 2.667010000  | -0.849969000 |
| 1 | 2.837812000  | -0.932512000 | 0.401731000  |
| 1 | 2.177061000  | 0.160405000  | -2.024764000 |
| 1 | 2.782205000  | 1.662424000  | 1.473007000  |
| 1 | -0.820317000 | -0.602252000 | -3.506115000 |
| 1 | -3.659188000 | 1.239620000  | 0.552040000  |
| 1 | 0.955352000  | -2.787989000 | -1.822030000 |
| 1 | 0.655844000  | -3.103268000 | -2.434369000 |
| 1 | 0.872459000  | -0.455281000 | 3.366892000  |
| 1 | 0.738141000  | -0.999155000 | 3.867484000  |
| 1 | -2.063690000 | 3.165663000  | -1.252955000 |
| 1 | -1.608704000 | 2.647556000  | -1.548671000 |
| 1 | -3.774359000 | 1.989417000  | 0.536106000  |
| 1 | -0.840093000 | -1.254976000 | -3.873513000 |
| 1 | -1.717381000 | -2.077784000 | 3.626930000  |
| 1 | -2.090364000 | -1.850117000 | 3.009205000  |
| 1 | -2.071644000 | -3.133277000 | -2.301263000 |
| 1 | -2.320118000 | -2.810848000 | -1.662497000 |
| 1 | -1.597829000 | 3.364224000  | 1.470549000  |
| 1 | -1.047355000 | 2.888370000  | 1.653659000  |
| 1 | 0.469848000  | -3.532736000 | 2.743113000  |
| 1 | 0.426441000  | -3.473530000 | 1.997960000  |
